# Supplementary material
Source: PubMed Central journal article supplement (PMC6225542)
Supplement: jnm202903SupplementalData.pdf [file jnm202903SupplementalData.pdf]

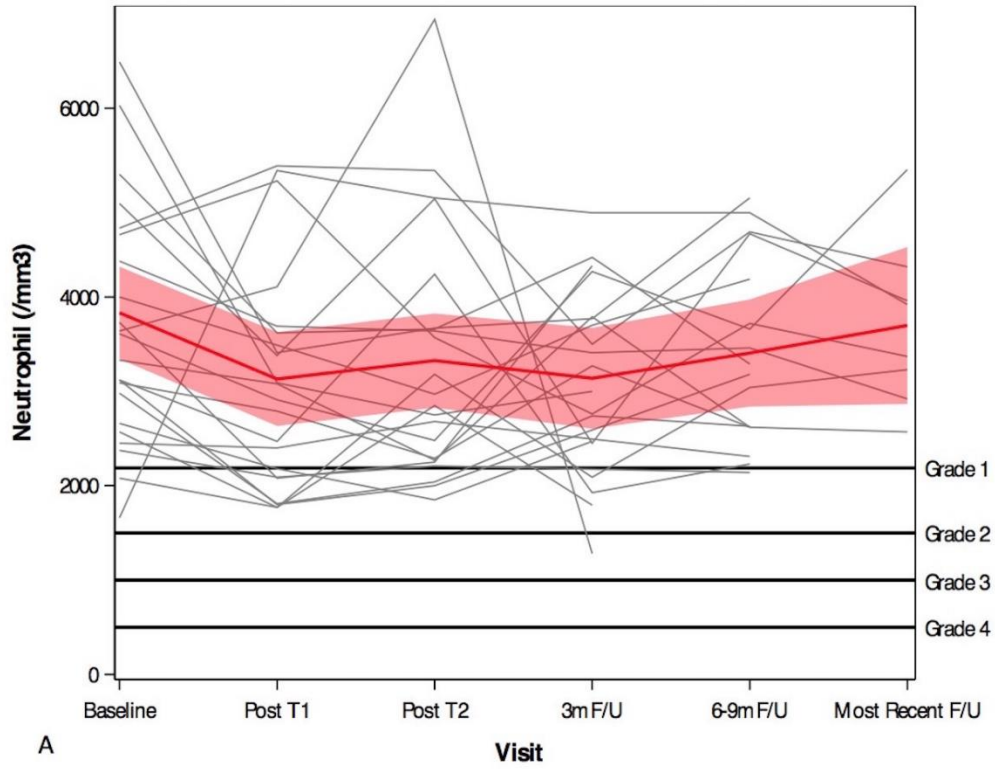

Supplemental Figure 1A: Change in neutrophil count over 3 treatment cycles and at follow-up.

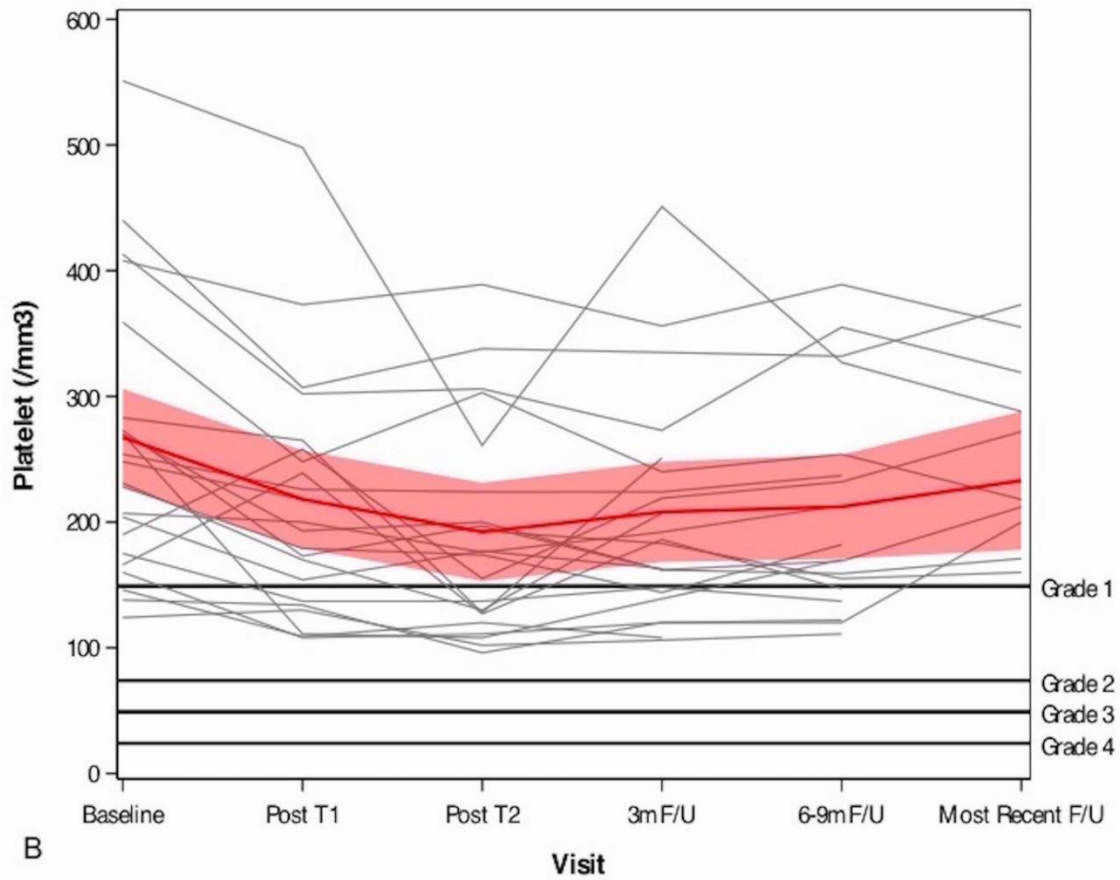

Supplemental Figure 1B: Change in platelet count over 3 treatment cycles and at follow-up.

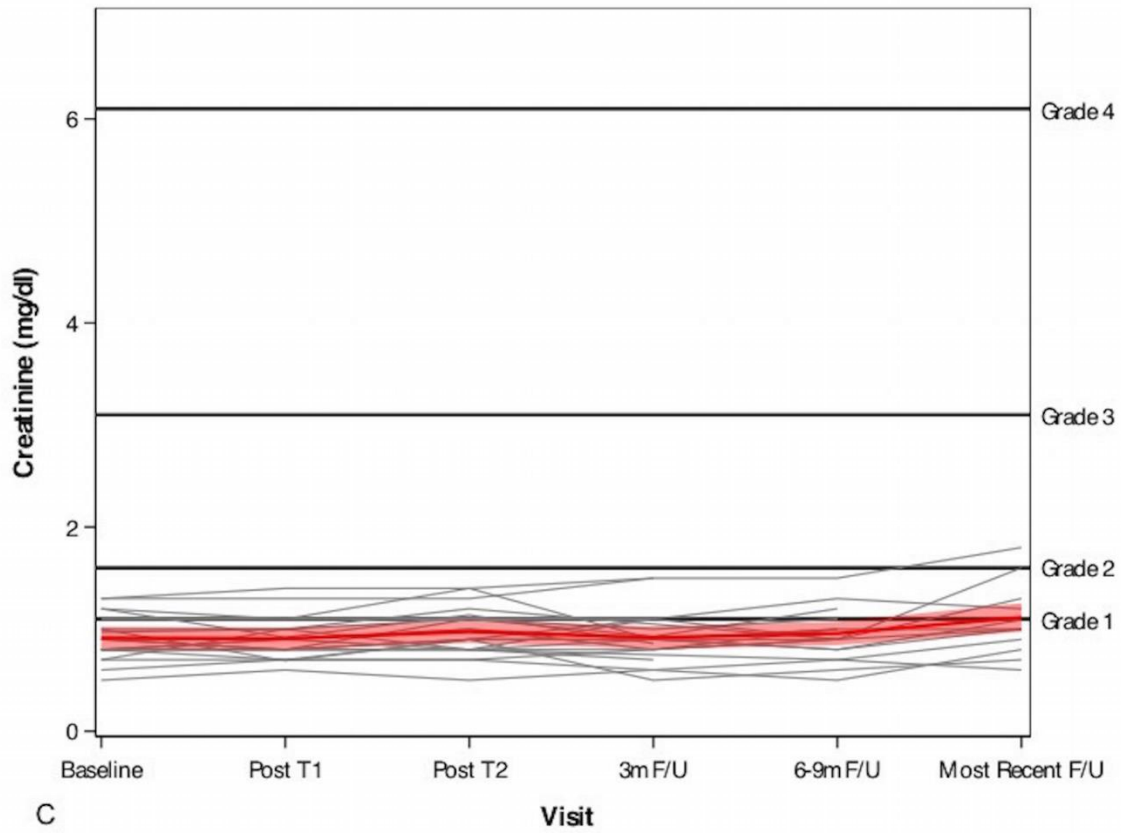

Supplemental figure 1C: Change in serum creatinine over 3 treatment cycles and at follow-up.
